# Supplementary material for: Estimation of the number of working population at high-risk of COVID-19 infection in Korea
Source: PubMed Central journal article supplement (PMC7871163; doi:10.4178/epih.e2020051), 2020-07-09
Supplement: epih-42-e2020051-suppl1.pdf [file epih-42-e2020051-suppl1.pdf]

Supplementary Material 1. Prevalence of workers who think their health and safety are at risk because of their work by occupations (%)

| Sixth SOC codes                                                                | %     |
|--------------------------------------------------------------------------------|-------|
| Metal Coremakers Related Trade Occupations                                     | 49.77 |
| Construction and Mining Related Elementary Occupations                         | 49.74 |
| Skilled Fishery Occupations                                                    | 45.34 |
| Construction and Mining Related Trade Occupations                              | 37.21 |
| Metal and Nonmetal Related Operator Occupations                                | 35.81 |
| Driving and Transport Related Occupations                                      | 35.79 |
| Transport Related Elementary Occupations                                       | 33.69 |
| Skilled Forestry Occupations                                                   | 32.45 |
| Police, Fire Fight and Security Related Service Occupations                    | 31.33 |
| Water Treatment and Recycling Related Operating Occupation                     | 30.79 |
| Other Technical Occupations                                                    | 29.01 |
| Electric and Electronic Related Trade Occupations                              | 26.40 |
| Transport and Machine Related Trade Occupations                                | 23.55 |
| Wood and Furniture, Musical Instrument and Signboard Related Trade Occupations | 22.42 |
| Machine Production and Related Machine Operators                               | 21.90 |
| Video and Telecommunications Equipment Related Occupations                     | 21.12 |
| Chemical Related Machine Operating Occupations                                 | 19.80 |
| Wood, Printing and Other Machine Operating Occupations                         | 18.66 |
| Electrical and Electronic Related Machine Occupations                          | 15.31 |
| Science Professionals and Related Occupations                                  | 14.71 |
| Textile and Shoes Related Machine Operating Occupations                        | 13.66 |
| Construction, Electricity and Production Related Managers                      | 13.10 |
| Agricultural, Livestock Related Skilled Occupations                            | 13.03 |
| Engineering Professionals and Technical Occupations                            | 11.99 |
| Textile, Clothing and Leather Relates Trade occupations                        | 11.55 |
| Food Processing Related Trades Occupations                                     | 11.50 |
| Food Processing Related Operating Occupations                                  | 11.19 |
| Physical Therapists and Medical Technologists                                  | 11.12 |
| Clean and Guard Related Elementary Occupations                                 | 10.77 |
| Administrative and Business Support Management Occupations                     | 10.10 |
| Cooking and Food Service Occupations                                           | 9.45  |
| Medical and Welfare Related Service Workers                                    | 9.45  |
| Nurses                                                                         | 8.70  |
| Household Chores and Cooking Attendants and Sales Related Elementary Workers   | 8.26  |
| Medical Specialists                                                            | 8.09  |
| Agriculture, Forestry, Fishing and Other Service Elementary Occupations        | 7.82  |
| Hairdressing and Wedding Service Workers                                       | 7.51  |
| Transport and Leisure Services Occupations                                     | 7.41  |
| Legal and Administration Professional Occupations                              | 7.22  |
| Health and Medical Related Workers                                             | 6.91  |
| Production Related Elementary Occupations                                      | 5.31  |
| Culture, Arts and Sports Professionals and Related Occupations                 | 4.72  |
| Store Sales Occupations                                                        | 4.48  |
| Sales Occupations                                                              | 4.16  |
| Information and Communication Professionals and Technical Occupations          | 3.99  |
| Religion Related Workers                                                       | 3.68  |
| Social Welfare Service Related Workers                                         | 2.98  |
| Consulting, Statistical and Information Clerks and Other Clerks                | 2.86  |
| Administration and Accounting Related Occupations                              | 2.60  |

|                                                                       |      |
|-----------------------------------------------------------------------|------|
| Dietitians                                                            | 2.58 |
| Door to Door, Street and Telecommunications Sales Related Occupations | 2.52 |
| Business and Finance Professionals and Related Occupations            | 2.48 |
| Pharmacists and Oriental Pharmacists                                  | 2.35 |
| Finance and Insurance Clerks                                          | 2.25 |
| Education Professionals and Related Occupations                       | 2.00 |
| Professional Services Management Occupations                          | 1.85 |
| Legal and Inspection Occupations                                      | 1.60 |
| Sales and Customer Service Managers                                   | -    |

Source: The fifth Korean Working Conditions Survey (2017). Sample weights were applied. Occupations in healthcare and welfare sectors by 3-digit codes and in other occupational sectors by 2-digit codes. SOC, Standard Occupational Classification.
